# Supplementary material for: The EMT-activator ZEB1 induces bone metastasis associated genes including BMP-inhibitors
Source: PubMed Central journal article supplement (PMC4546475; doi:10.18632/oncotarget.3882), 2015-05-05
Supplement: oncotarget-06-14399-s001.pdf [file oncotarget-06-14399-s001.pdf]

## SUPPLEMENTARY FIGURES AND TABLES

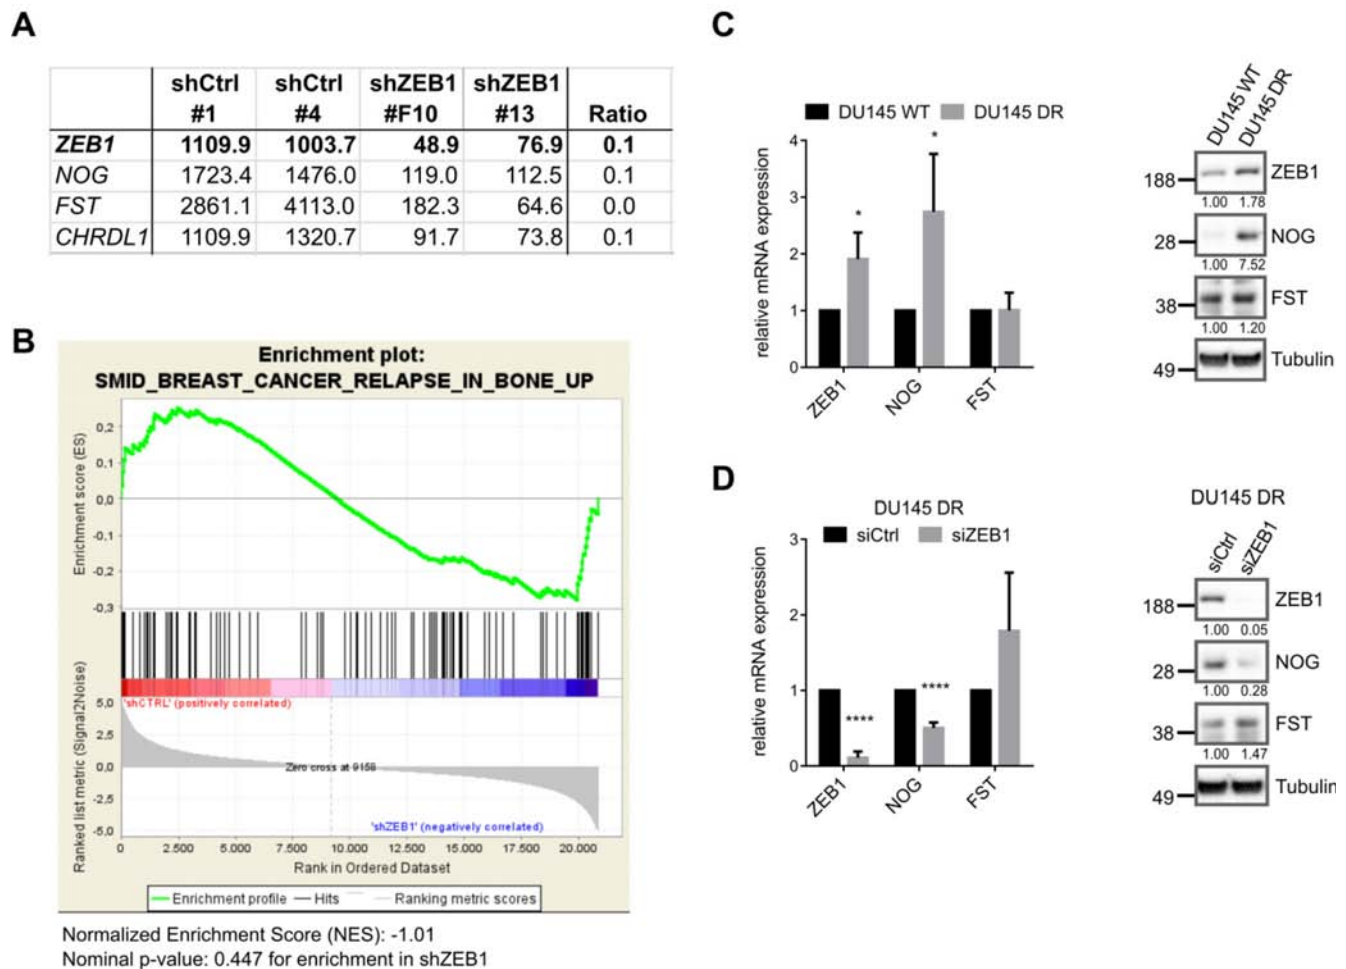**Supplementary Figure S1: ZEB1 regulates BMP-inhibitors but they are not enriched in primary breast tumors.**

**A.** Expression values (maximum probes) of ZEB1 and the indicated BMP-inhibitors deduced from a whole-genome expression screen comparing shRNA mediated ZEB1 knockdown and control knockdown clones in MDA-MB-231. **B.** Gene-Set-Enrichment-Analysis reveals no significant enrichment of the gene set SMID\_BREAST\_CANCER\_RELAPSE\_IN\_BONE with the shCtrl or shZEB1 phenotype. **C.** Selection of a docetaxel resistant (DR) subclone from DU145 prostate cancer cells induces ZEB1, as well as NOG and slightly FST expression, when compared to wild type (WT) DU145 as analyzed by qRT-PCR and western blot. qRT-PCR data are represented as mean +SD. **D.** siRNA mediated knockdown of ZEB1 in docetaxel resistant (DR) DU145 results in decreased mRNA and protein expression of NOG relative to siCtrl, as analyzed by qRT-PCR and western blot. FST is regulated antagonistically. qRT-PCR data are represented as mean +SD.

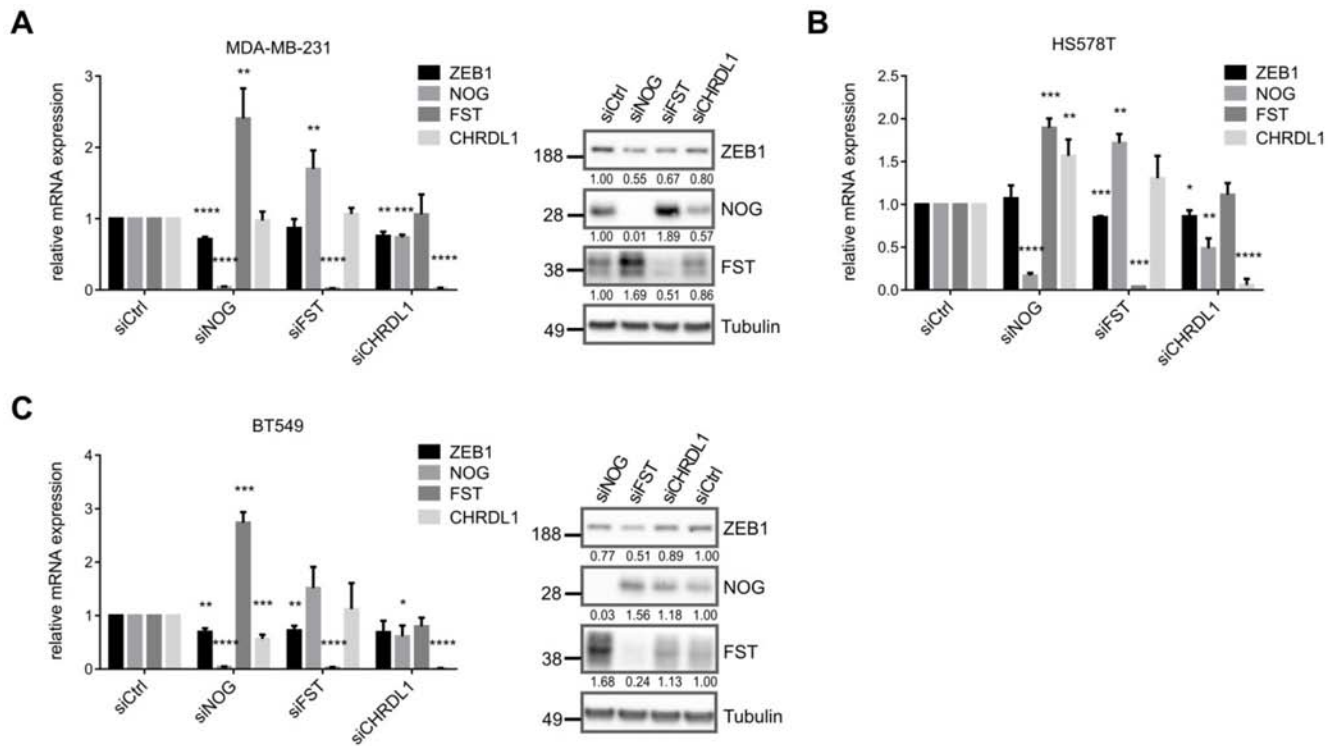

**Supplementary Figure S2: BMP-inhibitors NOG and FST are antagonistically regulated in breast cancer cells.** A-C. siRNA mediated knockdown of NOG, FST or CHRDL1 in MDA-MB-231, HS578T and BT549 breast cancer cell lines reveals antagonistic regulation of NOG and FST. Depletion of NOG increases FST and vice versa, as analyzed by qRT-PCR and western blot. qRT-PCR data are represented as mean +SD.

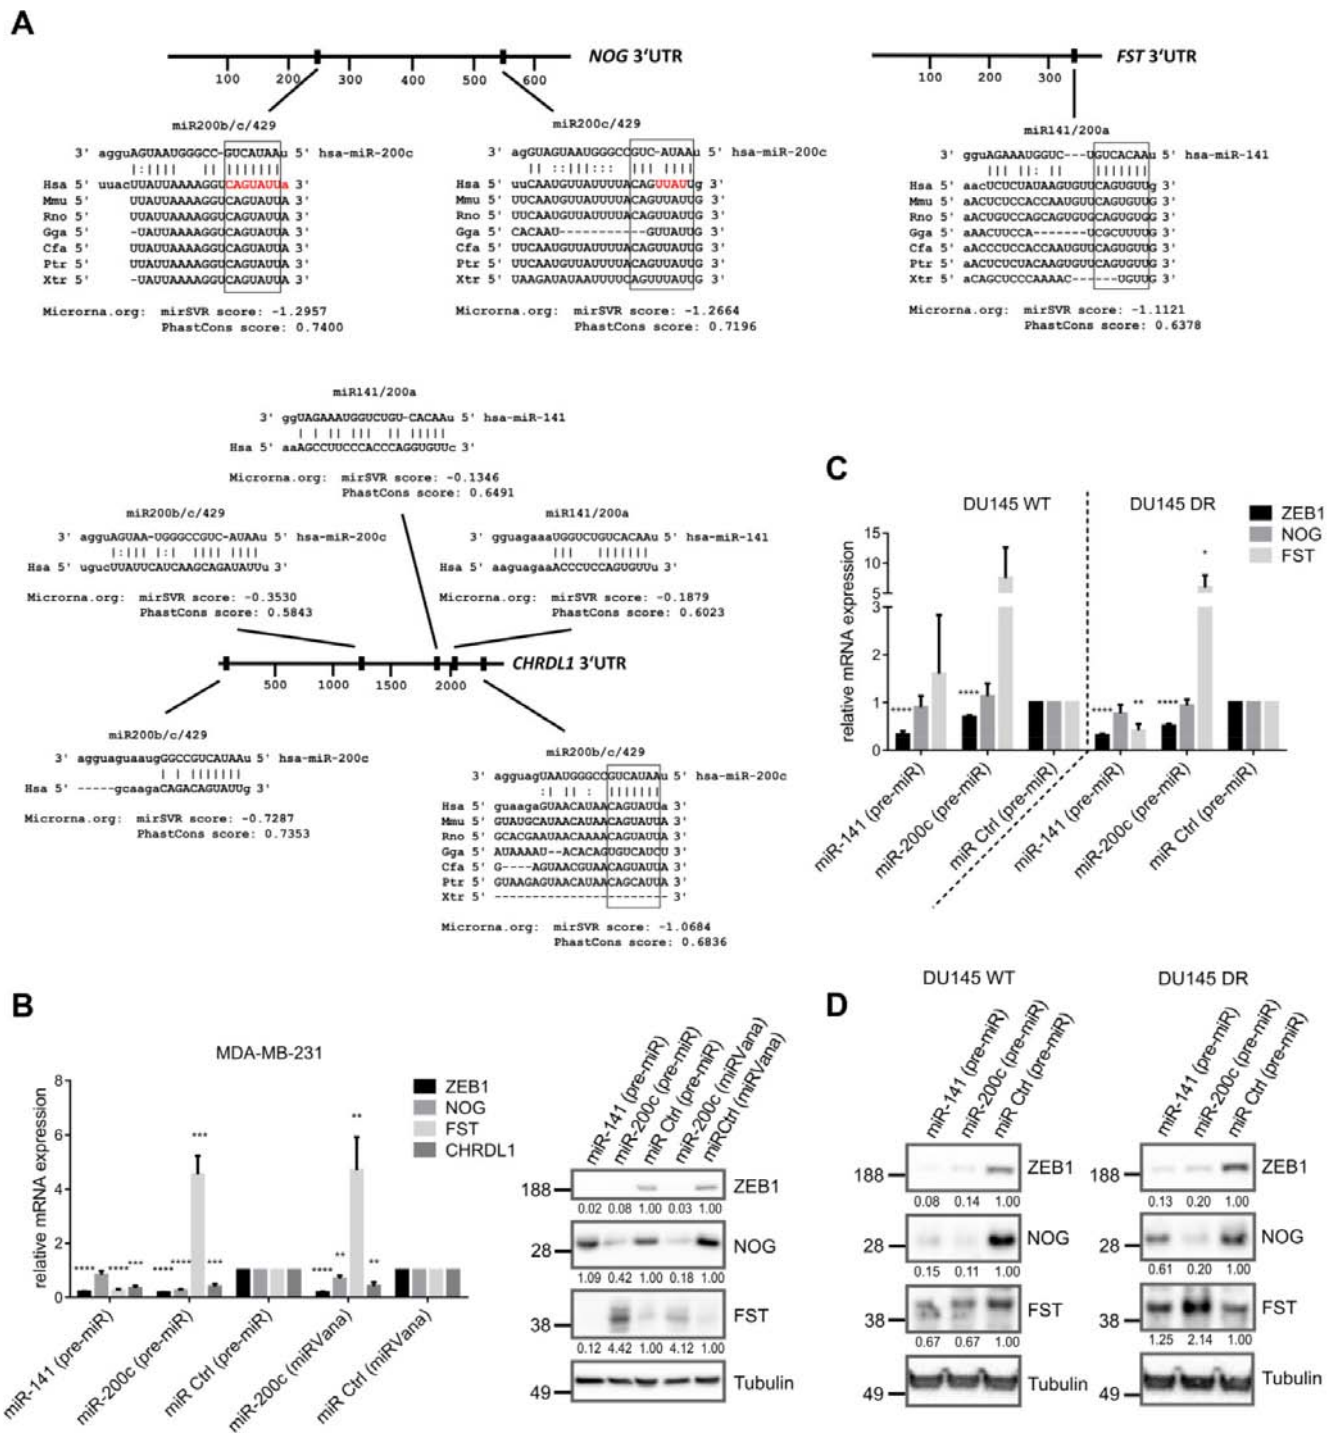

**Supplementary Figure S3: BMP-inhibitors are targets of the miR-200 family.** **A.** Schematic representation of the 3'UTRs of human *NOG*, *FST* and *CHRDL1* mRNAs. Predicted binding sites of miR-200 family members are shown with miRSVR scores and interspecies conservation as stated by microRNA.org and targetscan.org. Nucleotides that were deleted by site directed mutagenesis in the *NOG* 3'UTR-reporter are marked in red. Species abbreviations: Hsa: *Homo sapiens*, Mmu: *Mus musculus*, Rno: *Rattus norvegicus*, Gga: *Gallus gallus*, Cfa: *Canis lupus familiaris*, Ptr: *Pan troglodytes*, Xtr: *Xenopus tropicalis*. **B.** qRT-PCR and western blot analysis show targeting of ZEB1, NOG, FST and CHRDL1 by miR-200c or miR-141 (pre-miR or miRvana from life technologies) in MDA-MB-231. **C, D.** qRT-PCR and western blot analysis show targeting of ZEB1, NOG and FST by miR-200c or miR-141 (pre-miR from life technologies) in wildtype (WT) DU145 prostate cancer cells and docetaxel resistant (DR) DU145.

**Supplementary Table S1. Genes positively regulated by ZEB1 are upregulated in breast cancer bone metastases.**

| NAME   | Signal to noise | Rank | p-value  | Ratio shZEB1/shCtrl |
|--------|-----------------|------|----------|---------------------|
| FBN1   | 1.7422          | 1    | 0.001996 | 0.09                |
| IGFBP4 | 1.5333          | 2    | 0.001996 | 0.00                |
| BICC1  | 1.4256          | 3    | 0.001996 | 0.09                |
| MATN3  | 1.3994          | 4    | 0.001996 | 0.02                |
| FSTL1  | 1.3916          | 5    | 0.001996 | 0.10                |
| HEG1   | 1.3575          | 6    | 0.001996 | 0.04                |
| CDH11  | 1.3321          | 7    | 0.001996 | 0.01                |
| PRSS23 | 1.3202          | 8    | 0.001996 | 0.07                |
| VIM    | 1.2278          | 9    | 0.001996 | 0.01                |
| GJA1   | 1.1864          | 10   | 0.001996 | 0.01                |
| SPOCK1 | 1.1827          | 11   | 0.001996 | 0.05                |
| NT5E   | 1.1675          | 12   | 0.001996 | 0.06                |
| FST    | 1.14            | 13   | 0.001996 | 0.04                |
| COL5A1 | 1.1127          | 14   | 0.001996 | 0.02                |
| WIPF1  | 1.0997          | 15   | 0.001996 | 0.06                |
| ASAM   | 1.09            | 16   | 0.001996 | 0.11                |
| RFTN1  | 1.0574          | 17   | 0.001996 | 0.08                |
| SLC2A3 | 1.0545          | 18   | 0.001996 | 0.17                |
| HTRA1  | 1.0332          | 19   | 0.001996 | 0.04                |
| ZEB1   | 1.0072          | 20   | 0.001996 | 0.05                |
| FRMD6  | 0.999           | 21   | 0.001996 | 0.07                |
| SLIT2  | 0.9894          | 22   | 0.001996 | 0.09                |
| BCAT1  | 0.9754          | 23   | 0.001996 | 0.01                |
| PTPRM  | 0.9673          | 24   | 0.001996 | 0.15                |
| GPR68  | 0.9549          | 25   | 0.001996 | 0.03                |
| HNMT   | 0.9487          | 26   | 0.001996 | 0.06                |
| EDIL3  | 0.9284          | 27   | 0.001996 | 0.01                |
| NEDD4  | 0.9232          | 28   | 0.001996 | 0.15                |
| WNT5B  | 0.9158          | 29   | 0.001996 | 0.06                |
| FN1    | 0.9149          | 30   | 0.001996 | 0.06                |
| PTRF   | 0.913           | 31   | 0.001996 | 0.14                |
| NR3C1  | 0.9118          | 32   | 0.001996 | 0.10                |
| DOCK4  | 0.9116          | 33   | 0.001996 | 0.10                |
| NNMT   | 0.9089          | 34   | 0.001996 | 0.11                |
| LHFP   | 0.8839          | 35   | 0.001996 | 0.09                |
| HRH1   | 0.8749          | 36   | 0.001996 | 0.15                |

(Continued)

| NAME      | Signal to noise | Rank | p-value  | Ratio shZEB1/shCtrl |
|-----------|-----------------|------|----------|---------------------|
| CREB3L1   | 0.8609          | 37   | 0.001996 | 0.09                |
| VEGFC     | 0.8541          | 38   | 0.003992 | 0.02                |
| SDC2      | 0.8448          | 39   | 0.001996 | 0.07                |
| PMEPA1    | 0.8448          | 40   | 0.001996 | 0.10                |
| LPAR1     | 0.8299          | 41   | 0.001996 | 0.11                |
| ENPP1     | 0.8216          | 42   | 0.001996 | 0.18                |
| SCCPDH    | 0.8215          | 43   | 0.001996 | 0.02                |
| BMP2      | 0.7864          | 44   | 0.001996 | 0.15                |
| MCTP1     | 0.7746          | 45   | 0.001996 | 0.03                |
| DOCK10    | 0.7742          | 46   | 0.001996 | 0.06                |
| CSF1      | 0.7646          | 47   | 0.003992 | 0.06                |
| PTX3      | 0.758           | 48   | 0.003992 | 0.01                |
| MMP14     | 0.748           | 49   | 0.001996 | 0.18                |
| PDLIM4    | 0.7458          | 50   | 0.005988 | 0.05                |
| SNAI2     | 0.7122          | 51   | 0.001996 | 0.06                |
| LAPTM5    | 0.707           | 52   | 0.001996 | 0.01                |
| LOC729839 | 0.6889          | 53   | 0.001996 | 0.15                |
| NOG       | 0.6807          | 54   | 0.001996 | 0.07                |
| GNG11     | 0.6434          | 55   | 0.003992 | 0.00                |
| HLA-DRB1  | 0.6425          | 56   | 0.003992 | 0.09                |
| MLH1      | 0.6409          | 57   | 0.003992 | 0.14                |
| RAB34     | 0.6401          | 58   | 0.005988 | 0.01                |
| GGT5      | 0.6385          | 59   | 0.005988 | 0.05                |
| LY96      | 0.6327          | 60   | 0.001996 | 0.10                |
| HIC1      | 0.6318          | 61   | 0.00998  | 0.06                |
| ITGB2     | 0.6311          | 62   | 0.005988 | 0.10                |
| COL4A1    | 0.6261          | 63   | 0.007984 | 0.03                |
| CTGF      | 0.6243          | 64   | 0.005988 | 0.01                |
| CHST11    | 0.622           | 65   | 0.007984 | 0.11                |
| SRGN      | 0.6189          | 66   | 0.003992 | 0.00                |
| CD74      | 0.6171          | 67   | 0.007984 | 0.01                |
| LOX       | 0.6139          | 68   | 0.003992 | 0.04                |
| SH2B3     | 0.6088          | 69   | 0.005988 | 0.17                |
| ME3       | 0.5991          | 70   | 0.00998  | 0.04                |
| TLR4      | 0.5881          | 71   | 0.005988 | 0.04                |
| HLA-DRA   | 0.5826          | 72   | 0.01198  | 0.11                |
| HLA-DPA1  | 0.5784          | 73   | 0.00998  | 0.05                |
| IFI16     | 0.574           | 74   | 0.005988 | 0.01                |

(Continued)

| NAME     | Signal to noise | Rank | p-value | Ratio shZEB1/shCtrl |
|----------|-----------------|------|---------|---------------------|
| G0S2     | 0.566           | 75   | 0.01198 | 0.01                |
| TTC28    | 0.556           | 76   | 0.01198 | 0.11                |
| IL6ST    | 0.5161          | 77   | 0.01597 | 0.17                |
| PRICKLE2 | 0.5154          | 78   | 0.02994 | 0.14                |
| THBD     | 0.5014          | 79   | 0.01397 | 0.02                |
| SNAPC1   | 0.5006          | 80   | 0.01996 | 0.11                |
| SPG20    | 0.4967          | 81   | 0.01796 | 0.03                |
| CRISPLD1 | 0.4959          | 82   | 0.01597 | 0.02                |
| GBP3     | 0.4953          | 83   | 0.02395 | 0.01                |
| HBEGF    | 0.4901          | 84   | 0.01397 | 0.06                |
| CYR61    | 0.4815          | 85   | 0.01796 | 0.06                |
| TIMP4    | 0.4808          | 86   | 0.01198 | 0.06                |
| COL4A2   | 0.4738          | 87   | 0.02794 | 0.01                |
| JUN      | 0.4694          | 88   | 0.02794 | 0.12                |
| DPYD     | 0.4667          | 89   | 0.00998 | 0.03                |
| EFHA2    | 0.46            | 90   | 0.02395 | 0.03                |
| FOXP1    | 0.4592          | 91   | 0.01397 | 0.05                |
| TNIP1    | 0.4588          | 92   | 0.01996 | 0.15                |
| ARMCX1   | 0.4541          | 93   | 0.03992 | 0.02                |
| ANTXR2   | 0.4527          | 94   | 0.03393 | 0.02                |
| ARHGDIB  | 0.4317          | 95   | 0.03992 | 0.03                |
| COL13A1  | 0.4287          | 96   | 0.03393 | 0.02                |
| FAM26F   | 0.4264          | 97   | 0.0479  | 0.16                |
| IL31RA   | 0.4261          | 98   | 0.02395 | 0.04                |
| GALC     | 0.4206          | 99   | 0.03593 | 0.07                |
| NEGR1    | 0.4092          | 100  | 0.02595 | 0.03                |
| FMNL1    | 0.4072          | 101  | 0.02395 | 0.05                |
| RIN2     | 0.4021          | 102  | 0.0499  | 0.02                |
| APOL3    | 0.4016          | 103  | 0.02595 | 0.08                |
| ESAM     | 0.4012          | 104  | 0.04591 | 0.04                |
| PLXDC2   | 0.3953          | 105  | 0.0499  | 0.08                |
| SLFN12   | 0.3866          | 106  | 0.07984 | 0.06                |
| PYCARD   | 0.3824          | 107  | 0.0479  | 0.02                |
| FAM129A  | 0.3815          | 108  | 0.06986 | 0.07                |
| LRRC33   | 0.3808          | 109  | 0.04591 | 0.04                |
| GPX3     | 0.3766          | 110  | 0.0499  | 0.01                |
| EVC      | 0.3756          | 111  | 0.06387 | 0.02                |
| EDEM1    | 0.3749          | 112  | 0.06387 | 0.16                |

(Continued)

| NAME     | Signal to noise | Rank | p-value | Ratio shZEB1/shCtrl |
|----------|-----------------|------|---------|---------------------|
| LIMCH1   | 0.3724          | 113  | 0.1158  | 0.10                |
| C8ORF42  | 0.3701          | 114  | 0.07385 | 0.08                |
| ZNF521   | 0.3628          | 115  | 0.1058  | 0.11                |
| SHISA2   | 0.3588          | 116  | 0.06986 | 0.01                |
| CARD6    | 0.3523          | 117  | 0.06587 | 0.06                |
| DLC1     | 0.3468          | 118  | 0.06786 | 0.01                |
| ZNF404   | 0.3335          | 119  | 0.1018  | 0.04                |
| IL6      | 0.3231          | 120  | 0.08782 | 0.02                |
| GLRB     | 0.3191          | 121  | 0.1198  | 0.03                |
| LAYN     | 0.3138          | 122  | 0.1257  | 0.02                |
| ADAMTS1  | 0.3116          | 123  | 0.1257  | 0.01                |
| NRP1     | 0.3083          | 124  | 0.1257  | 0.01                |
| IGFBP7   | 0.3067          | 125  | 0.1118  | 0.00                |
| CCDC8    | 0.3041          | 126  | 0.1417  | 0.12                |
| WWC3     | 0.3036          | 127  | 0.1377  | 0.11                |
| ADRB2    | 0.3034          | 128  | 0.1178  | 0.02                |
| IL1B     | 0.3017          | 129  | 0.1078  | 0.05                |
| LPHN2    | 0.2915          | 130  | 0.1238  | 0.03                |
| PSMB8    | 0.2902          | 131  | 0.1557  | 0.00                |
| KIF7     | 0.287           | 132  | 0.1537  | 0.02                |
| PEA15    | 0.2846          | 133  | 0.1357  | 0.17                |
| GNB4     | 0.2775          | 134  | 0.1717  | 0.01                |
| KIAA0495 | 0.2745          | 135  | 0.1637  | 0.07                |
| ZNF331   | 0.2725          | 136  | 0.1776  | 0.15                |
| ROBO1    | 0.2721          | 137  | 0.1597  | 0.03                |
| RGMB     | 0.2706          | 138  | 0.1756  | 0.14                |
| GPC6     | 0.2693          | 139  | 0.1856  | 0.07                |
| LEF1     | 0.2674          | 140  | 0.1796  | 0.04                |
| MICAL2   | 0.265           | 141  | 0.1876  | 0.09                |
| VNN1     | 0.2646          | 142  | 0.1856  | 0.03                |
| FRMD4A   | 0.2633          | 143  | 0.1697  | 0.07                |
| MEIS3P1  | 0.2583          | 144  | 0.2056  | 0.06                |
| ROBO4    | 0.2581          | 145  | 0.1896  | 0.07                |
| NAV3     | 0.256           | 146  | 0.1976  | 0.04                |
| SPRY1    | 0.254           | 147  | 0.2096  | 0.16                |
| ECM1     | 0.2465          | 148  | 0.2176  | 0.09                |
| DUSP10   | 0.2457          | 149  | 0.2236  | 0.13                |
| SPANXB1  | 0.244           | 150  | 0.2575  | 0.00                |

(Continued)

| NAME      | Signal to noise | Rank | p-value | Ratio shZEB1/shCtrl |
|-----------|-----------------|------|---------|---------------------|
| LOC642852 | 0.2389          | 151  | 0.2295  | 0.17                |
| LOC375295 | 0.2323          | 152  | 0.2315  | 0.02                |
| DTX3      | 0.2252          | 153  | 0.2535  | 0.09                |
| SLITRK5   | 0.223           | 154  | 0.2555  | 0.03                |
| APCDD1L   | 0.2214          | 155  | 0.2375  | 0.00                |
| LXN       | 0.2148          | 156  | 0.2635  | 0.04                |
| RIT1      | 0.2144          | 157  | 0.2615  | 0.13                |
| NEXN      | 0.2122          | 158  | 0.2675  | 0.03                |
| CAP2      | 0.21            | 159  | 0.2914  | 0.12                |
| SPANXA1   | 0.208           | 160  | 0.3932  | 0.00                |
| SLC22A4   | 0.2077          | 161  | 0.2774  | 0.07                |
| CCDC106   | 0.2061          | 162  | 0.2914  | 0.07                |
| GNA15     | 0.2033          | 163  | 0.2814  | 0.02                |
| GBP1      | 0.2026          | 164  | 0.2774  | 0.01                |
| TFPI2     | 0.1997          | 165  | 0.2415  | 0.00                |
| MPDZ      | 0.199           | 166  | 0.3054  | 0.06                |
| PAWR      | 0.1973          | 167  | 0.3553  | 0.16                |
| CROT      | 0.1972          | 168  | 0.3154  | 0.09                |
| RAPH1     | 0.1925          | 169  | 0.3553  | 0.16                |
| TCEAL3    | 0.1893          | 170  | 0.3313  | 0.01                |
| GPR116    | 0.1806          | 171  | 0.3353  | 0.01                |
| RARRES3   | 0.1804          | 172  | 0.3373  | 0.06                |
| CFB       | 0.1755          | 173  | 0.3433  | 0.07                |
| C6ORF150  | 0.1736          | 174  | 0.3792  | 0.05                |
| ARSJ      | 0.1699          | 175  | 0.3653  | 0.04                |
| LRRC34    | 0.1699          | 176  | 0.3673  | 0.02                |
| LOC339400 | 0.1685          | 177  | 0.3852  | 0.06                |
| TMEM192   | 0.1593          | 178  | 0.4291  | 0.11                |
| KAL1      | 0.1572          | 179  | 0.4172  | 0.04                |
| S100P     | 0.154           | 180  | 0.4152  | 0.08                |
| NCF2      | 0.1527          | 181  | 0.4431  | 0.02                |
| C1ORF133  | 0.1513          | 182  | 0.4491  | 0.05                |
| ZC3H12A   | 0.1506          | 183  | 0.4411  | 0.17                |
| BASP1     | 0.1504          | 184  | 0.4112  | 0.00                |
| CNKSR2    | 0.1441          | 185  | 0.477   | 0.15                |
| LPXN      | 0.1384          | 186  | 0.4551  | 0.04                |

(Continued)



| NAME         | Signal to noise | Rank | p-value | Ratio shZEB1/shCtrl |
|--------------|-----------------|------|---------|---------------------|
| CD302        | 0.1376          | 187  | 0.5289  | 0.03                |
| TCEAL1       | 0.1289          | 188  | 0.495   | 0.04                |
| NNT          | 0.1238          | 189  | 0.523   | 0.03                |
| UBR4         | 0.1226          | 190  | 0.5289  | 0.15                |
| TGFB2        | 0.1146          | 191  | 0.5589  | 0.03                |
| CBR1         | 0.1108          | 192  | 0.6008  | 0.01                |
| C4ORF19      | 0.09379         | 193  | 0.6208  | 0.03                |
| PNMAL1       | 0.09314         | 194  | 0.6447  | 0.01                |
| RAB32        | 0.08509         | 195  | 0.6587  | 0.03                |
| CHPT1        | 0.08491         | 196  | 0.6427  | 0.17                |
| TLR2         | 0.07477         | 197  | 0.6826  | 0.04                |
| NAV2         | 0.07387         | 198  | 0.7086  | 0.05                |
| ZNF804A      | 0.06668         | 199  | 0.6387  | 0.04                |
| C15ORF48     | 0.06628         | 200  | 0.7006  | 0.00                |
| MAP9         | 0.06452         | 201  | 0.7385  | 0.07                |
| ACOT1        | 0.06387         | 202  | 0.6866  | 0.01                |
| PDE10A       | 0.06318         | 203  | 0.7086  | 0.09                |
| SPANXC       | 0.06228         | 204  | 0.7365  | 0.00                |
| NLRP3        | 0.06121         | 205  | 0.7425  | 0.04                |
| CHFR         | 0.0606          | 206  | 0.7405  | 0.03                |
| LOC142937    | 0.05893         | 207  | 0.7565  | 0.16                |
| PDCD1LG2     | 0.05567         | 208  | 0.6786  | 0.13                |
| LOC100130744 | 0.05229         | 209  | 0.7944  | 0.04                |
| ZSCAN18      | 0.05196         | 210  | 0.7525  | 0.16                |
| TUSC1        | 0.04987         | 211  | 0.8543  | 0.02                |
| RPL39L       | 0.04981         | 212  | 0.8303  | 0.00                |
| EFEMP1       | 0.04704         | 213  | 0.8204  | 0.01                |
| GPR133       | 0.04644         | 214  | 0.7605  | 0.10                |
| SLC43A3      | 0.03955         | 215  | 0.8283  | 0.14                |
| TFE3         | 0.03574         | 216  | 0.8882  | 0.18                |
| MNS1         | 0.03451         | 217  | 0.8144  | 0.05                |
| CLCN4        | 0.03332         | 218  | 0.8603  | 0.09                |
| CD99L2       | 0.03306         | 219  | 0.8523  | 0.16                |
| C21ORF56     | 0.02797         | 220  | 0.9042  | 0.06                |
| NRG1         | 0.02551         | 221  | 0.8882  | 0.02                |
| KCNQ5        | 0.02133         | 222  | 0.8703  | 0.01                |

(Continued)

| NAME    | Signal to noise | Rank | p-value | Ratio shZEB1/shCtrl |
|---------|-----------------|------|---------|---------------------|
| SPTLC3  | 0.01879         | 223  | 0.9182  | 0.01                |
| C8ORF48 | 0.01643         | 224  | 0.8982  | 0.05                |
| IFIT3   | 0.0157          | 225  | 0.8743  | 0.02                |
| TMEM71  | 0.01405         | 226  | 0.8962  | 0.02                |
| LAMB3   | 0.01117         | 227  | 0.982   | 0.13                |
| EXT1    | 0.009627        | 228  | 0.9701  | 0.14                |
| SLFN13  | 0.00737         | 229  | 0.9621  | 0.11                |
| IGFBPL1 | 0.005467        | 230  | 0.9202  | 0.01                |
| FAM113B | 0.00283         | 231  | 0.984   | 0.05                |
| RGNEF   | -0.001106       | 232  | 0.998   | 0.11                |
| ZNF605  | -0.001679       | 233  | 0.988   | 0.01                |
| OAS2    | -0.002677       | 234  | 0.9581  | 0.11                |
| TRAF1   | -0.003147       | 235  | 0.9641  | 0.17                |
| CXCL11  | -0.006686       | 236  | 0.98    | 0.06                |
| ACOT12  | -0.01205        | 237  | 0.9281  | 0.09                |
| GSTM3   | -0.01385        | 238  | 0.9681  | 0.03                |
| APBB1IP | -0.01396        | 239  | 0.9661  | 0.05                |
| TMEM156 | -0.01539        | 240  | 0.99    | 0.11                |
| IFIT2   | -0.01774        | 241  | 0.9701  | 0.03                |
| ZCCHC18 | -0.02323        | 242  | 0.9162  | 0.08                |
| IL7R    | -0.02341        | 243  | 0.9142  | 0.03                |
| SERTAD4 | -0.02437        | 244  | 0.8563  | 0.06                |
| PRTFDC1 | -0.02442        | 245  | 0.9062  | 0.01                |
| A1BG    | -0.02916        | 246  | 0.8663  | 0.17                |
| CTSF    | -0.03467        | 247  | 0.8523  | 0.16                |
| RSAD2   | -0.03638        | 248  | 0.9261  | 0.08                |
| IL8     | -0.03668        | 249  | 0.8882  | 0.02                |
| ZNF674  | -0.03937        | 250  | 0.7864  | 0.16                |
| ICAM4   | -0.04065        | 251  | 0.8603  | 0.07                |
| TOX     | -0.04242        | 252  | 0.9162  | 0.10                |
| ZNF439  | -0.04386        | 253  | 0.8423  | 0.03                |
| CDH4    | -0.04547        | 254  | 0.7884  | 0.03                |
| IRAK2   | -0.04656        | 255  | 0.8523  | 0.18                |
| TACSTD2 | -0.04711        | 256  | 0.8862  | 0.01                |
| NSAP11  | -0.05028        | 257  | 0.7864  | 0.08                |
| MAFF    | -0.05451        | 258  | 0.7764  | 0.14                |

(Continued)

| NAME      | Signal to noise | Rank | p-value | Ratio shZEB1/shCtrl |
|-----------|-----------------|------|---------|---------------------|
| CHRDL1    | -0.05506        | 259  | 0.8104  | 0.07                |
| ZC3H12C   | -0.06019        | 260  | 0.7026  | 0.16                |
| TAPBPL    | -0.06323        | 261  | 0.8643  | 0.09                |
| WNK3      | -0.07007        | 262  | 0.7226  | 0.13                |
| RAD54L2   | -0.07701        | 263  | 0.6806  | 0.04                |
| TRBC1     | -0.07708        | 264  | 0.7764  | 0.08                |
| TUG1      | -0.07895        | 265  | 0.6707  | 0.15                |
| HDGFRP3   | -0.08136        | 266  | 0.6886  | 0.03                |
| STAP2     | -0.0857         | 267  | 0.6208  | 0.11                |
| LOC339290 | -0.08873        | 268  | 0.6168  | 0.03                |
| PPAPDC1A  | -0.0947         | 269  | 0.5968  | 0.03                |
| LOC285628 | -0.1002         | 270  | 0.6307  | 0.01                |
| OASL      | -0.1127         | 271  | 0.6347  | 0.10                |
| HDAC9     | -0.1128         | 272  | 0.6267  | 0.11                |
| ZNF573    | -0.113          | 273  | 0.6188  | 0.14                |
| LY6K      | -0.1165         | 274  | 0.5768  | 0.03                |
| CLDN1     | -0.119          | 275  | 0.5729  | 0.14                |
| FLJ44054  | -0.1248         | 276  | 0.5349  | 0.11                |
| TM4SF1    | -0.1414         | 277  | 0.4192  | 0.01                |
| CHIC2     | -0.1414         | 278  | 0.4291  | 0.16                |
| CXORF61   | -0.1416         | 279  | 0.519   | 0.07                |
| PCDHGA4   | -0.1494         | 280  | 0.4251  | 0.05                |
| KCNMB3    | -0.1548         | 281  | 0.5309  | 0.03                |
| C6ORF155  | -0.1602         | 282  | 0.4411  | 0.01                |
| ZNF470    | -0.1603         | 283  | 0.513   | 0.16                |
| HOXD3     | -0.1615         | 284  | 0.4631  | 0.08                |
| TUSC3     | -0.171          | 285  | 0.4012  | 0.01                |
| KCNN3     | -0.1728         | 286  | 0.3573  | 0.01                |
| C3        | -0.1758         | 287  | 0.3713  | 0.03                |
| NACAP1    | -0.1841         | 288  | 0.3693  | 0.17                |
| ACSL5     | -0.1852         | 289  | 0.4731  | 0.14                |
| CSF2      | -0.1893         | 290  | 0.3473  | 0.03                |
| PLCB4     | -0.1932         | 291  | 0.3313  | 0.17                |
| FGF5      | -0.1963         | 292  | 0.2874  | 0.04                |
| WT1       | -0.1964         | 293  | 0.4371  | 0.02                |
| KISS1     | -0.2031         | 294  | 0.2974  | 0.08                |
| STAC      | -0.213          | 295  | 0.3194  | 0.11                |
| KRT7      | -0.2142         | 296  | 0.2455  | 0.02                |

(Continued)

| NAME         | Signal to noise | Rank | p-value | Ratio shZEB1/shCtrl |
|--------------|-----------------|------|---------|---------------------|
| LOC728705    | -0.2154         | 297  | 0.3832  | 0.15                |
| QPCT         | -0.2185         | 298  | 0.3273  | 0.03                |
| GCKR         | -0.2317         | 299  | 0.2655  | 0.10                |
| PLAC8        | -0.2341         | 300  | 0.3473  | 0.01                |
| SPRYD5       | -0.2442         | 301  | 0.2335  | 0.13                |
| GAS2         | -0.2492         | 302  | 0.3792  | 0.07                |
| NRSN2        | -0.2566         | 303  | 0.1936  | 0.02                |
| HOMER2       | -0.2599         | 304  | 0.2116  | 0.09                |
| QSOX1        | -0.2667         | 305  | 0.1816  | 0.10                |
| C18ORF18     | -0.2733         | 306  | 0.1677  | 0.10                |
| CRIM1        | -0.2745         | 307  | 0.1796  | 0.12                |
| FOXA2        | -0.276          | 308  | 0.4531  | 0.04                |
| ZNF426       | -0.2828         | 309  | 0.1537  | 0.02                |
| NXF5         | -0.2843         | 310  | 0.1637  | 0.16                |
| ZNF432       | -0.285          | 311  | 0.1796  | 0.07                |
| ATXN7        | -0.2874         | 312  | 0.1537  | 0.13                |
| ZNF529       | -0.2902         | 313  | 0.2076  | 0.07                |
| ANKRD1       | -0.2914         | 314  | 0.2016  | 0.03                |
| VLDLR        | -0.2988         | 315  | 0.1776  | 0.08                |
| STC1         | -0.2998         | 316  | 0.1457  | 0.06                |
| ZNF788       | -0.3101         | 317  | 0.1717  | 0.01                |
| EGFR         | -0.3124         | 318  | 0.1198  | 0.14                |
| ZNF569       | -0.3232         | 319  | 0.1277  | 0.03                |
| ZNF71        | -0.3348         | 320  | 0.1018  | 0.06                |
| TSPYL5       | -0.3355         | 321  | 0.09581 | 0.04                |
| OGFRL1       | -0.3406         | 322  | 0.0998  | 0.11                |
| CHST10       | -0.3441         | 323  | 0.09381 | 0.09                |
| CLDN11       | -0.3456         | 324  | 0.1138  | 0.09                |
| TMEM163      | -0.3459         | 325  | 0.1497  | 0.04                |
| IL1RAPL1     | -0.3467         | 326  | 0.1098  | 0.13                |
| MYEF2        | -0.3469         | 327  | 0.06188 | 0.05                |
| LOC100130938 | -0.3476         | 328  | 0.09381 | 0.10                |
| SMAP1        | -0.3612         | 329  | 0.06786 | 0.07                |
| MANSC1       | -0.3745         | 330  | 0.05389 | 0.18                |
| SNAP91       | -0.3795         | 331  | 0.07784 | 0.04                |
| ZNF420       | -0.3835         | 332  | 0.06587 | 0.06                |

(Continued)

| NAME      | Signal to noise | Rank | <i>p</i> -value | Ratio shZEB1/shCtrl |
|-----------|-----------------|------|-----------------|---------------------|
| IGFBP1    | -0.3928         | 333  | 0.06587         | 0.01                |
| GCNT2     | -0.3983         | 334  | 0.03792         | 0.01                |
| SPAG16    | -0.4483         | 335  | 0.01597         | 0.05                |
| ZNF615    | -0.4586         | 336  | 0.03792         | 0.17                |
| TIMM17B   | -0.477          | 337  | 0.02196         | 0.16                |
| ZNF140    | -0.4777         | 338  | 0.02395         | 0.04                |
| LOC643650 | -0.4844         | 339  | 0.02595         | 0.11                |
| KRT81     | -0.4917         | 340  | 0.01597         | 0.00                |
| ZNF20     | -0.5487         | 341  | 0.01597         | 0.30                |
| SHC3      | -0.5591         | 342  | 0.001996        | 0.13                |
| USP44     | -0.5638         | 343  | 0.005988        | 0.02                |
| STK40     | -0.58           | 344  | 0.00998         | 0.09                |
| CCNA1     | -0.6185         | 345  | 0.001996        | 0.02                |
| FOXF2     | -0.6476         | 346  | 0.005988        | 0.14                |
| C21ORF7   | -0.6566         | 347  | 0.005988        | 0.10                |
| ZNF260    | -0.7255         | 348  | 0.001996        | 0.04                |
| GFAP      | -0.7562         | 349  | 0.001996        | 0.11                |
| SLAIN1    | -1.2514         | 350  | 0.001996        | 0.04                |

The top 350 genes positively regulated by ZEB1 were ranked according to differential expression (signal to noise ratio) in bone metastases vs. other metastatic sites by GENE-E program. 110 out of 350 genes are significantly higher expressed in bone metastases with  $p < 0.05$ . Column 5 shows the ratio mean shZEB1/mean shCtrl calculated from the expression array data of MDA-MB-231 with stable shRNA mediated knockdown of ZEB1.

**Supplementary Table S2. Sequences of all oligonucleotides, siRNAs, miRNAs and AntagomiRs**

| <b>Oligonucleotides</b>              |                                       |
|--------------------------------------|---------------------------------------|
| <b>Primer ChIP</b>                   |                                       |
| NOG for                              | 5'-TACCTGAGGCAGAAGGTGCT-3'            |
| NOG rev                              | 5'-CTGACTGGTCCGTTTTGGTT-3'            |
| FST -1500bp for                      | 5'-AGGTCACCCGCTTTTACCAG-3'            |
| FST -1500bp rev                      | 5'-GAAAGTGGGCATGAATCACA-3'            |
| FST +50bp for                        | 5'-AATTGGGAAGGGTTTCCAGA-3'            |
| FST +50bp rev                        | 5'-GGGAGCTTTCAAAGTTCAGTG-3'           |
| CHRD1 for                            | 5'-GGGGAGTCAGAGGGTAGTCG-3'            |
| CHRD1 rev                            | 5'-CTCTGCACTGGATGCACCT-3'             |
| EPCAM for                            | 5'-GCCAGGTAAGCTCAAAGG-3'              |
| EPCAM rev                            | 5'-GCGGGAAGTGGATAGAGGA-3'             |
| miR-200c for                         | 5'-CAGGAGGACACACCTGTGC-3'             |
| miR-200c rev                         | 5'-TCCCCTGGTGGCCTTTAC-3'              |
| HPRT1 for                            | 5'-TGAGAGTTCAAGTTGAGTTTGA-3'          |
| HPRT1 rev                            | 5'-TGATAATTTACTGGCGATGTCA-3'          |
| <b>Primer qRT-PCR</b>                |                                       |
| ACTB for                             | 5'-GCCCTGAGGCACTCTTCCA-3'             |
| ACTB rev                             | 5'-TTGCGGATGTCCACGTCA-3'              |
| ZEB1 for                             | 5'-AAGAATTCACAGTGGAGAGAAGCCA-3'       |
| ZEB1 rev                             | 5'-CGTTTCTTGCAGTTTGGGCATT-3'          |
| NOG for                              | 5'-ATTCTGCCCCGTGCTGTA-3'              |
| NOG rev                              | 5'-TGCCCACCTTCACGTAGC-3'              |
| FST for                              | 5'-TGCCACCTGAGAAAGGCTAC-3'            |
| FST rev                              | 5'-TGGATATCTTACAGGACTTTGC-3'          |
| CHRD1 for                            | 5'-GCCGAGTCAGATGTCCAAAT-3'            |
| CHRD1 rev                            | 5'-ACTGGGGTAAGGAGTCTGG-3'             |
| MMP9 (mouse) for                     | 5'-ACGACATAGACGGCATCCA-3'             |
| MMP9 (mouse) rev                     | 5'-GCTGTGGTTCAGTTGTGGTG-3'            |
| ACTB (mouse) for                     | 5'-TTACGGATGTCAACGTCA-3'              |
| ACTB (mouse) rev                     | 5'-GCCCTGAGGCTCTTTTCCA-3'             |
| <b>Primer cloning promoters</b>      |                                       |
| NOGpromoter long for (XhoI)          | 5'-ATAATCTCGAGCACAGAAAGGTAGGGCTGGA-3' |
| NOGpromoter short for (XhoI)         | 5'-ATAATCTCGAGTAGGGGCTGTGTGTGTGTGT-3' |
| NOGpromoter long/short rev (HindIII) | 5'-ATAATAAGCTTCTGGCTGAGCTGGTTCTAGG-3' |

(Continued)
